# Supplementary material
Source: Springer Nature journal article supplement (https://www.springermedizin.de/resource/supplementary/12885_2014_4965_MOESM6_ESM.pdf/9467872)

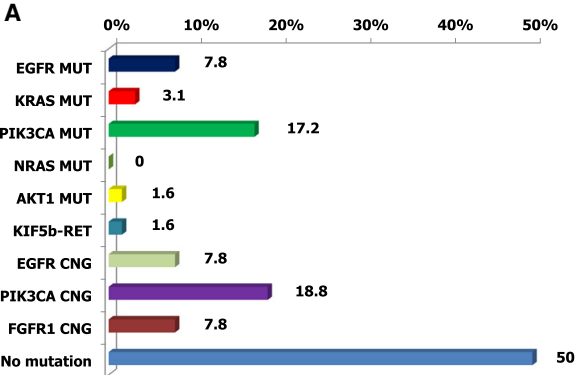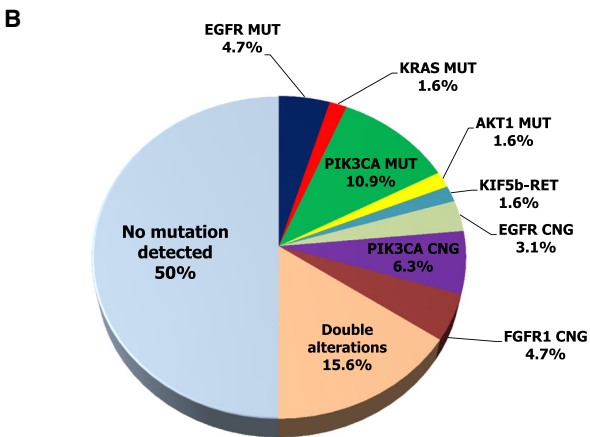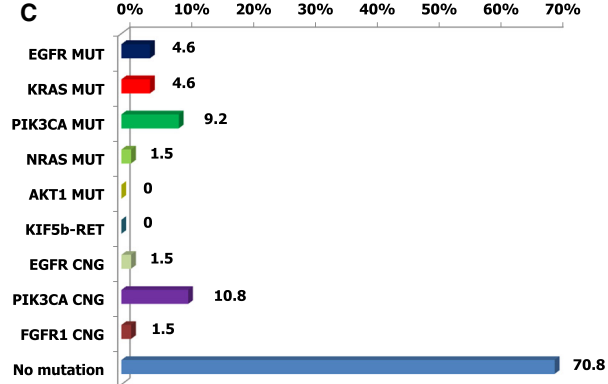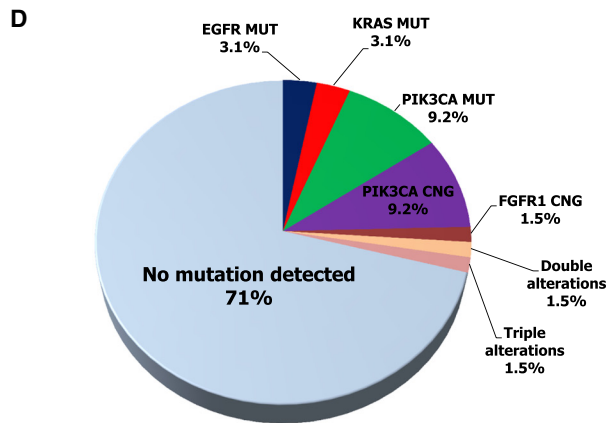

Supplement: MOESM6 [file 9467872]
